# Supplementary material for: Characterization of circRNA–miRNA–mRNA networks regulating oxygen utilization in type II alveolar epithelial cells of Tibetan pigs
Source: Front Mol Biosci. 2022 Sep 21;9:854250. doi: 10.3389/fmolb.2022.854250 (PMC9532862; doi:10.3389/fmolb.2022.854250)
Supplement: Supplementary file 11 [file Table7.XLS]

## Sheet: Sheet1
7.1 The intersection of circRNA–miRNA pairs and mRNA–miRNA pairs was filtered, and pairs based on the DEmiRNAs were identified in the TN vs. TL
ssc-let-7g
ssc-miR-1
ssc-miR-10382
ssc-miR-10386
ssc-miR-10390
ssc-miR-122-5p
ssc-miR-1271-3p
ssc-miR-1285
ssc-miR-129a-3p
ssc-miR-129a-5p
ssc-miR-129b
ssc-miR-133a-3p
ssc-miR-136-5p
ssc-miR-137
ssc-miR-139-3p
ssc-miR-141
ssc-miR-145-5p
ssc-miR-146b
ssc-miR-192
ssc-miR-194a-5p
ssc-miR-205
ssc-miR-20b
ssc-miR-21-3p
ssc-miR-210
ssc-miR-218
ssc-miR-218-5p
ssc-miR-218b
ssc-miR-2320-3p
ssc-miR-2483
ssc-miR-32
ssc-miR-326
ssc-miR-335
ssc-miR-378b-3p
ssc-miR-382
ssc-miR-4331-5p
ssc-miR-454
ssc-miR-486
ssc-miR-490
ssc-miR-490-3p
ssc-miR-503
ssc-miR-6529
ssc-miR-7-3p
ssc-miR-7-5p
ssc-miR-92b-3p

## Sheet: Sheet2
7.2 The intersection of circRNA–miRNA pairs and mRNA–miRNA pairs was filtered, and pairs based on the DEmiRNAs were identified in the LN vs. LL
ssc-miR-1
ssc-miR-10386
ssc-miR-1285
ssc-miR-133a-3p
ssc-miR-139-5p
ssc-miR-144
ssc-miR-20b
ssc-miR-29a-5p
ssc-miR-30c-3p
ssc-miR-326
ssc-miR-335
ssc-miR-33b-3p
ssc-miR-4334-3p
ssc-miR-450b-3p
ssc-miR-486
ssc-miR-490
ssc-miR-490-3p
ssc-miR-545-5p
ssc-miR-671-5p
